# Supplementary material for: PCK1 as a potential hub gene in distinguishing lactate metabolism between rheumatoid arthritis and osteoarthritis
Source: PeerJ. 2025 Jul 31;13:e19661. doi: 10.7717/peerj.19661 (PMC12318502; doi:10.7717/peerj.19661)
Supplement: Supplemental Information 5 [file peerj-13-19661-s005.xlsx]

## Sheet: qPCR
Si-NC	Si-PCK1#1	Si-PCK1#2	Si-PCK1#3
1.12538	0.59	0.27	0.287311
1.0064	0.56	0.28	0.278662
0.804415	0.62	0.19	0.120545
1.09762	0.64	0.35	0.168091

## Sheet: lactate levels
Si-NC	Si-PCK1#1	Si-PCK1#2	Si-PCK1#3
0.393	0.228	0.108	0.08
0.26	0.156	0.111	0.06
0.341	0.246	0.195	0.075
0.292	0.204	0.154	0.12

## Sheet: Apoptosis rate
Si-NC	Si-PCK1#3
5.91	10.12
4.4	10.61
5.86	10.23
7.43	11.32

## Sheet: Migration area rate
Si-NC	Si-PCK1#3
53.598	32.4317
57.5221	27.5818
35.3162	24.6914
43.2852	17.6437
