# Supplementary material for: PCK1 as a potential hub gene in distinguishing lactate metabolism between rheumatoid arthritis and osteoarthritis
Source: PeerJ. 2025 Jul 31;13:e19661. doi: 10.7717/peerj.19661 (PMC12318502; doi:10.7717/peerj.19661)
Supplement: Supplemental Information 7 [file peerj-13-19661-s007.xls]

## Sheet: Sheet1
ITEM TO CHECK	IMPORTANCE	CHECKLIST	page/line
EXPERIMENTAL DESIGN
Definition of experimental and control groups	E	The experimental group consisted of RA-FLS cells with PCK1 knockdown, while the control group was composed of cells transfected with negative control siRNA (Si-NC).	P16，line150-151
Number within each group	E	4 samples in each group
Assay carried out by core lab or investigator's lab?	D
Acknowledgement of authors' contributions	D
SAMPLE
Description	E	Synovial tissue samples were dissociated to isolate RA-FLS cells.	P16，line142-149
Volume/mass of sample processed	D
Microdissection or macrodissection	E	Not applicable
Processing procedure	E		P16，line142-149
If frozen - how and how quickly?	E	liquid nitrogen
If fixed - with what, how quickly?	E	Not applicable
Sample storage conditions and duration (especially for FFPE samples)	E	RNA was either immediately reverse transcribed or stored at -196°C
NUCLEIC ACID EXTRACTION
Procedure and/or instrumentation	E	Total RNA Extraction from RA-FLS Using the Simply P Total RNA Extraction Kit (BioFlux, China) 1. Cell Lysis A total of 350 μL of lysis buffer (RL Buffer) was added to the cell pellet, and the mixture was pipetted repeatedly until complete cell lysis was achieved, resulting in a clear solution. The lysate was then transferred to a 1.5 mL RNase-free centrifuge tube. 2. Genomic DNA Removal To remove…	P16，line156-157
Name of kit and details of any modifications	E		P16，line156-157
Source of additional reagents used	D
Details of DNase or RNAse treatment	E	There was no DNase treatment applied as the focus was on RNA extraction and cDNA synthesis. The RNA was treated with RNase-free water to avoid contamination.
Contamination assessment (DNA or RNA)	E	The purity of RNA was assessed by measuring the A260/A280 ratio, which provides an indication of protein contamination	P16，line158-159
Nucleic acid quantification	E	RNA concentration and purity were measured using a NanoDrop spectrophotometer (Nanodrop2000).	P16，line155-159
Instrument and method	E	The quantification of RNA was performed using a NanoDrop spectrophotometer, which measures absorbance to determine RNA concentration and purity.	P16，line155-159
Purity (A260/A280)	D
Yield	D
RNA integrity method/instrument	E	The RNA integrity was assessed using the NanoDrop spectrophotometer by measuring the A260/A280 ratio, which gives an indication of RNA purity. However, no specific RNA integrity number (RIN) or gel electrophoresis data were provided to assess RNA integrity further.
RIN/RQI or Cq of 3' and 5' transcripts	E	Not applicable
Electrophoresis traces	D
Inhibition testing (Cq dilutions, spike or other)	E	The quality of the RNA was primarily assessed through concentration and purity metrics (A260/A280 ratio).	P16，line155-159
REVERSE TRANSCRIPTION
Complete reaction conditions	E	Use a standard PCR machine to conduct the reverse transcription reaction (converting RNA to cDNA) under these conditions: 25°C for 5 minutes (primer binding step) 50°C for 15 minutes (reverse transcription process) 85°C for 5 seconds (reaction termination) Hold at 4°C (to store the sample).Use a CFX96 real-time PCR machine and run the following cycling conditions: 95°C for 1 minute (initial denat…	P16，line159-165
Amount of RNA and reaction volume	E	Amount of RNA：2 μg reaction volume:20 μL	P16，line151
Priming oligonucleotide (if using GSP) and concentration	E	1 µL of forward primer (10 µM), 1 µL of reverse primer (10 µM)	P16，line161-162
Reverse transcriptase and concentration	E	Reagent Volume 5X PrimeScript Buffer 4μl PrimeScript RT Enzyme Mix I 1μl Oligo dT Primer（50 μM） 1μl Random 6 mers（100 μM） 1μl （Total RNA RNase Free H2O ） Total 13 μL	P16，line159-165
Temperature and time	E		P16，line163-165
Manufacturer of reagents and catalogue numbers	D
Cqs with and without RT	D*
Storage conditions of cDNA	D
qPCR TARGET INFORMATION
If multiplex, efficiency and LOD of each assay.	E	Not applicable
Sequence accession number	E	Not applicable
Location of amplicon	D	Not applicable
Amplicon length	E	Not applicable
In silico specificity screen (BLAST, etc)	E	Not applicable
Pseudogenes, retropseudogenes or other homologs?	D	Not applicable
Sequence alignment	D	Not applicable
Secondary structure analysis of amplicon	D	Not applicable
Location of each primer by exon or intron (if applicable)	E	Not applicable
What splice variants are targeted?	E	Not applicable
qPCR OLIGONUCLEOTIDES
Primer sequences	E	Gene Forward Primer Reverse Primer PCK1 GGAAGCCTGGACAGCCTACC TCCTCAGAGCCGTCACAGATG GAPDH CATGTTCGTCATGGGGTGAACCA AGTGATGGCATGGACTGTGGTCAT	Supplementary Material，Supplementary table 1，P1，line2
RTPrimerDB Identification Number	D
Probe sequences	D**
Location and identity of any modifications	E	No modifications
Manufacturer of oligonucleotides	D	Sangon Biotech
Purification method	D	Not applicable
qPCR PROTOCOL
Complete reaction conditions	E	Thaw the components at room temperature, briefly centrifuge, and place on ice. Prepare the reaction mixture by adding 4 µL of 5x Reaction Buffer, 1 µL of Primer, 1 µL of SweScript RT I Enzyme Mix, 2 µg of Total RNA, and nuclease-free water to a final volume of 20 µL. After mixing and briefly centrifuging, perform reverse transcription on a standard PCR machine under the following conditions: 25°C…	P17，line166-173
Reaction volume and amount of cDNA/DNA	E	The total reaction volume was 20 µL, containing 3 µL of cDNA (which was previously diluted).	P17，line168
Primer, (probe), Mg++ and dNTP concentrations	E	The primer concentrations were each 10 µM. The dNTP concentrations and Mg++ concentrations are typically included in the Master Mix	P17，line166-173
Polymerase identity and concentration	E	The polymerase was included in the Universal Blue SYBR Green qPCR Master Mix	P17，line166-173
Buffer/kit identity and manufacturer	E	The buffer was part of the 2xUniversal Blue SYBR Green qPCR Master Mix provided by the manufacturer,reagents provided by Bio-Rad Laboratories, Inc.	P17，line166-173
Exact chemical constitution of the buffer	D
Additives (SYBR Green I, DMSO, etc.)	E	The key additive used in the qPCR is SYBR Green I, which is part of the qPCR Master Mix.	P17，line166-173
Manufacturer of plates/tubes and catalog number	D
Complete thermocycling parameters	E	Pre-denaturation (Initial step): 95°C, 30 s PCR Amplification (40 cycles): 95°C, 5 s; 60°C, 30 s Melting Curve Generation: 95°C, 15 s; 60°C, 30 s; 95°C, 15 s	P17，line170-173
Reaction setup (manual/robotic)	D	Not applicable
Manufacturer of qPCR instrument	E	The qPCR was performed using the CFX Connect Real-Time PCR Detection System by BIO-RAD	P17，line166-173
qPCR VALIDATION
Evidence of optimisation (from gradients)	D	Not applicable
Specificity (gel, sequence, melt, or digest)	E	Use gel electrophoresis and melting curve analysis	P17，line166-173
For SYBR Green I, Cq of the NTC	E	25	P17，line166-173
Standard curves with slope and y-intercept	E	Y=-3.4X+31.93	P17，line166-173
PCR efficiency calculated from slope	E	0.9542	P17，line166-173
Confidence interval for PCR efficiency or standard error	D	Not applicable
r2 of standard curve	E	0.9998	P17，line166-173
Linear dynamic range	E	90%-110%	P17，line166-173
Cq variation at lower limit	E	15-35	P17，line166-173
Confidence intervals throughout range	D	Not applicable
Evidence for limit of detection	E	Not applicable
If multiplex, efficiency and LOD of each assay.	E	Not applicable
DATA ANALYSIS
qPCR analysis program (source, version)	E	Bio-Rad CFX Manager, version 3.1	P17，line174-177
Cq method determination	E	Automatic threshold determination	P17，line174-177
Outlier identification and disposition	E	Outliers identified by deviation from mean Cq values and excluded from final analysis	P17，line174-177
Results of NTCs	E	No amplification detected in NTC
Justification of number and choice of reference genes	E	GAPDH used as a reference gene due to its stable expression across all samples	Supplementary Material，Supplementary table 1，P1，line2
Description of normalisation method	E	ΔΔCq method used for normalization with GAPDH as the reference gene.	P17，line174-177
Number and concordance of biological replicates	D	Not applicable
Number and stage (RT or qPCR) of technical replicates	E	4 technical replicates per sample at the qPCR stage.
Repeatability (intra-assay variation)	E
Reproducibility (inter-assay variation, %CV)	D	Not applicable
Power analysis	D	Not applicable
Statistical methods for result significance	E		P18,line233-235
Software (source, version)	E		P18,line233-235
Cq or raw data submission using RDML	D	Not applicable
Table 1. MIQE checklist for authors, reviewers and editors. All essential information (E) must be submitted with the manuscript. Desirable
information (D) should be submitted if available. If using primers obtained from RTPrimerDB, information on qPCR target, oligonucleotides,
protocols and validation is available from that source.
*: Assessing the absence of DNA using a no RT assay is essential when first extracting RNA. Once the sample has been validated as
RDNA-free, inclusion of a no-RT control is desirable, but no longer essential.
**: Disclosure of the probe sequence is highly desirable and strongly encouraged. However, since not all commercial pre-designed assay
vendors provide this information, it cannot be an essential requirement. Use of such assays is advised against.
